# Supplementary material
Source: Elsevier journal article supplement (https://www.sciencedirect.com/science/article/pii/S1138359318302879)
Supplement: mmc1 [file S1138359318302879:mmc1.pdf]

## Apéndice A.

Preguntas generales sobre los recursos disponibles y organización del centro de trabajo: Bloque 1 de la encuesta a médicos de AP

**P1.-** ¿Dispone en su centro de trabajo de los siguientes recursos? En el caso de no disponer directamente de ellos en su centro, ¿puede solicitar dichos recursos para que los resultados estén disponibles en las primeras 24 horas tras su petición?

- Pulsioxímetro
- Espirómetro
- Electrocardiógrafo
- Radiología
- Laboratorio de análisis clínicos
- Analizador de gases arteriales
- Otros recursos (especificar)

**P2.-** ¿Dispone de historia clínica informatizada?

**P3.-** En caso afirmativo, ¿está integrada con el hospital?

**P4.-** En el caso de no disponer de historia clínica integrada con el hospital, ¿tiene alguna forma de consulta/acceso a la historia clínica del hospital?  
En caso afirmativo especificar.

**P5.-** ¿Dispone de algún protocolo de actuación/vía clínica para el manejo agudo de la exacerbación de EPOC específico de su centro? En caso afirmativo especificar.

**P6.-** ¿Dispone en su centro de trabajo de protocolos establecidos de derivación al especialista de los pacientes que presentan exacerbación de EPOC? En caso afirmativo especificar.

**P7.-** ¿Dispone de algún programa de contacto con el especialista hospitalario para ayuda del manejo del paciente con exacerbación de EPOC? En caso afirmativo especificar.

Abreviaturas: EPOC: Enfermedad Pulmonar Obstructiva Crónica; P: Pregunta.
