# Supplementary material
Source: Elsevier journal article supplement (https://www.sciencedirect.com/science/article/pii/S1138359318302879)
Supplement: mmc2 [file S1138359318302879:mmc2.pdf]

## Apéndice B.

Preguntas generales sobre los recursos disponibles y organización del centro de trabajo: Bloque 1 de la encuesta a neumólogos e internistas

**P1.-** ¿Dispone su hospital de los siguientes recursos?

- Ventilación mecánica no invasiva
- AngioTC
- Determinación de niveles de BNP
- Determinación de niveles de Troponina
- Determinación de Dímero D

**P2.-** En relación a la VMNI, ¿podría indicar los recursos de los que dispone su hospital?

- VMNI en sala de hospitalización
- Equipos de monitorización de la VMNI
- Personal suficientemente entrenado en la sala de hospitalización para emplear la VMNI

**P3.-** Además de la hospitalización en planta, ¿dispone su hospital de otros modelos asistenciales de hospitalización?

- UCRI
- Unidad de corta estancia
- Hospitalización a domicilio
- Hospital de estancia prolongada

**P4.-** ¿Puede realizar en su hospital rehabilitación respiratoria precoz en pacientes hospitalizados por agudización de EPOC?

|                                                                                                                                                                                     |
|-------------------------------------------------------------------------------------------------------------------------------------------------------------------------------------|
| <b>P5.-</b> ¿Dispone de historia clínica informatizada?                                                                                                                             |
| <b>P6.-</b> En caso afirmativo, ¿está integrada con los centros de AP del área?                                                                                                     |
| <b>P7.-</b> En el caso de no disponer de historia clínica integrada con AP, ¿tiene alguna forma de consulta/acceso a la historia clínica de AP? En caso afirmativo especificar.     |
| <b>P8.-</b> ¿Dispone en algún protocolo de actuación/vía clínica para el manejo agudo de la exacerbación de EPOC específico de su hospital? En caso afirmativo especificar.         |
| <b>P9.-</b> ¿Dispone su hospital de una unidad/consulta específica para EPOC? En caso afirmativo especificar.                                                                       |
| <b>P10.-</b> ¿Dispone su hospital de algún programa de contacto con el médico de AP para ayuda del manejo del paciente con exacerbación de la EPOC? En caso afirmativo especificar. |

Abreviaturas: AngioTC: Angiografía por Tomografía Computerizada; AP: Atención Primaria; BNP: Péptido Natriurético de tipo B; EPOC: Enfermedad Pulmonar Obstructiva Crónica; P: Pregunta; UCRI: Unidad de Cuidados intermedios Respiratorios; VMNI: Ventilación Mecánica No Invasiva.
